# Supplementary material
Source: HighWire-hosted journal article supplement (https://jnm.snmjournals.org/highwire/filestream/93911/field_highwire_adjunct_files/0/Supplemental_Table_1_for_Tseng_et_al.pdf)
Supplement: Supplemental_Table_1_for_Tseng_et_al.pdf [file Supplemental_Table_1_for_Tseng_et_al.pdf]

### SUPPLEMENTAL TABLE 1

Comparison of tumor volumes and blood glucose measurements over time

| Day | Control mice                                |                                      | Drug treated mice                           |                                    |
|-----|---------------------------------------------|--------------------------------------|---------------------------------------------|------------------------------------|
|     | Mean tumor volume<br>(mm <sup>3</sup> ± SD) | Mean blood glucose<br>(mg/dL ± SD)** | Mean tumor volume<br>(mm <sup>3</sup> ± SD) | Mean blood glucose<br>(mg/dL ± SD) |
| 6   | 182 ± 40                                    | 91 ± 45                              | 197 ± 32                                    | 137 ± 49                           |
| 8   | 249 ± 69                                    | 107 ± 49                             | 275 ± 110                                   | 142 ± 31                           |
| 10  | 371 ± 114                                   | 99 ± 23                              | 324 ± 156                                   | 128 ± 47                           |
| 14  | 1627 ± 636                                  | 67 ± 43                              | 623 ± 308                                   | 124 ± 30                           |
| 16  | 2540 ± 885                                  | 77 ± 14*                             | 758 ± 691                                   | 129*                               |
| 21  |                                             |                                      | 1080 ± 522                                  | 146 ± 44                           |

\*Due to difficulties with blood draws, blood glucose measurements were determined in only two mice for the control group and in one mouse for the drug treated group.

\*\*The mean blood glucose for the control mice had a trend of lower mean glucose measurements which was driven by 1-2 outlier mice with extremely low blood glucose levels.
